# Supplementary material for: Male mice lacking ADAMTS-16 are fertile but exhibit testes of reduced weight
Source: PubMed Central journal article supplement (PMC6868159; doi:10.1038/s41598-019-53900-0), 2019-11-20
Supplement: 41598_2019_53900_MOESM1_ESM.pdf [file 41598_2019_53900_MOESM1_ESM.pdf]

## **SUPPLEMENTARY FIGURES**

**for**

**Male mice lacking ADAMTS-16 are fertile but exhibit  
testes of reduced weight**

**by**

Catherine Livermore, Nick Warr, Nicolas Chalon, Pam

Siggers, Joffrey Mianné, Gemma Codner, Lydia Teboul, Sara

Wells & Andy Greenfield

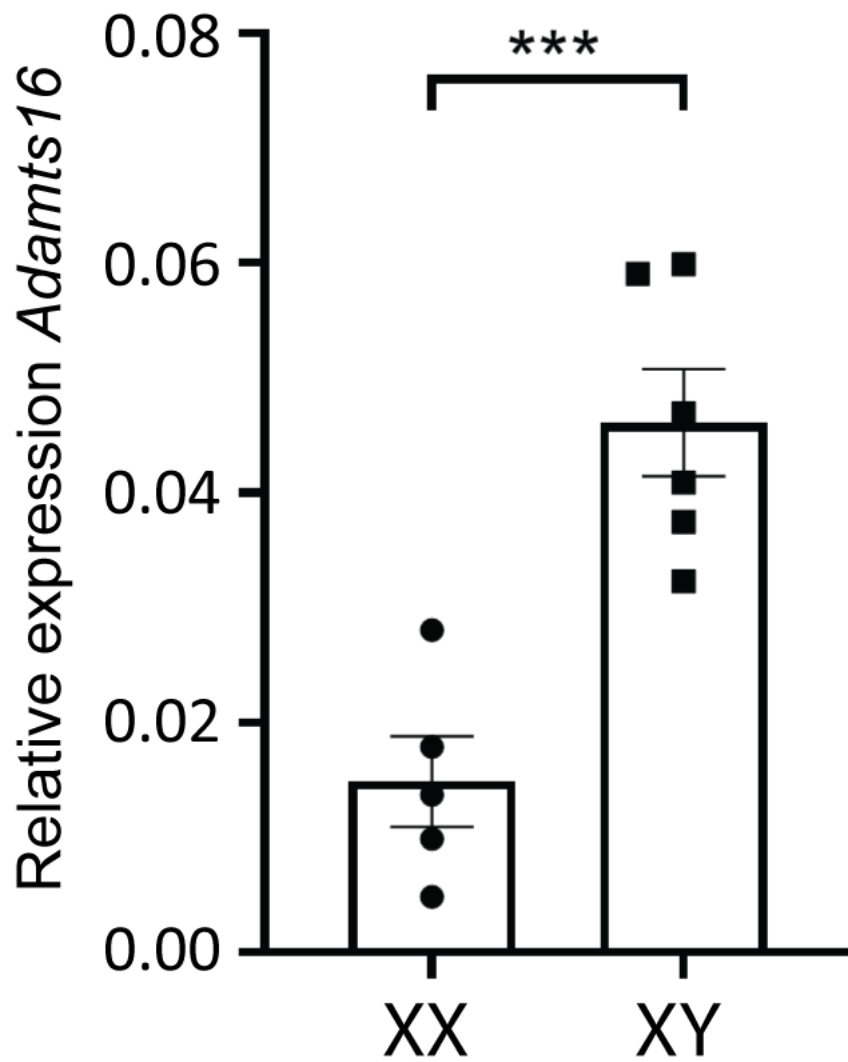

**Figure S1.** Analysis of expression of *Adamts16* expression in the developing gonads of female (XX) and male (XY) embryos at 12.5 dpc using qRT-PCR.

\*\*\*,  $p \leq 0.01$  (student's *t*-test).

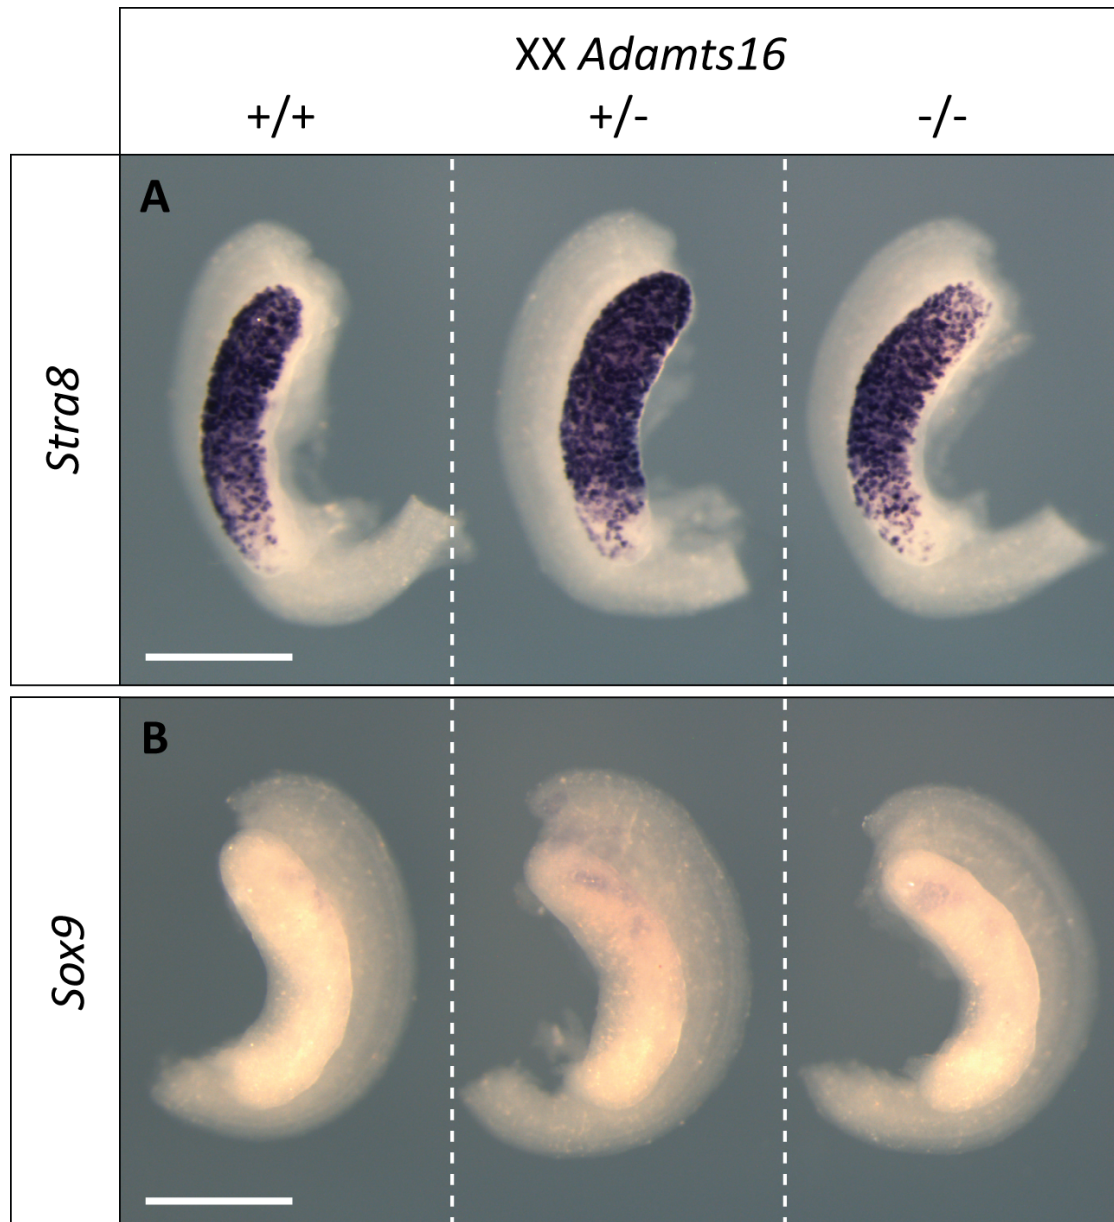

**Figure S2.** Marker gene expression in XX control and mutant gonads at 14.5 dpc. A) Expression of the germ cell marker *Stra8* is unaffected in *Adamts16* *-/-* XX gonads at 14.5 dpc when compared to heterozygous and wild-type controls; B) Similarly, *Sox9* expression is unaffected in homozygous mutants compared to controls. Scale bar = 0.5 mm.



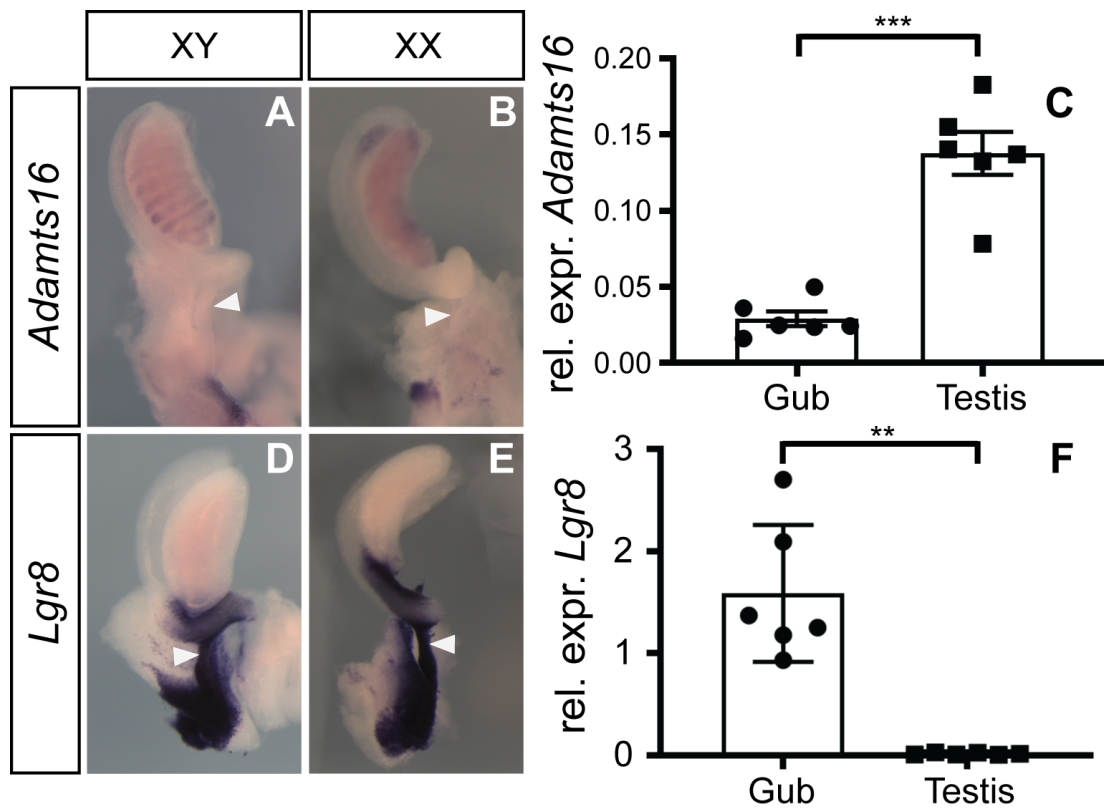

**Figure S4.** Analysis of *Adamts16* expression in the fetal gubernaculum at 14.5 dpc. A-C) WMISH with an *Adamts16* probe reveals expression in the testis cords of the XY gonad (A), but no detectable expression in the gubernaculum (white arrowhead) at the same stage. Expression is also undetectable in the XX gubernaculum (B); qRT-PCR reveals negligible expression in the gubernaculum (Gub) compared to that in the testis (C); D-F) Control experiments, examining expression of the known gubernaculum marker *Lgr8*, reveal strong expression in the gubernaculum of XY (D) and XX (E) fetuses (white arrowheads), confirmed by qRT-PCR (F). *Lgr8* is undetectable in the gonads at this stage (D-F). \*\*\*,  $p \leq 0.01$ ; \*\*,  $p \leq 0.05$  (student's *t*-test).
